# Supplementary material for: Mesostructured graphitic carbon nitride as a new base catalyst for the efficient synthesis of dimethyl carbonate by transesterification
Source: Royal Society of Chemistry journal article supplement (doi:10.1039/c3cy00517h), 2013-01-01
Supplement: c3cy00517h.pdf [file c3cy00517h.pdf]

## Supporting Information for

### Mesostructured graphitic carbon nitride as a new base catalyst for the efficient synthesis of dimethyl carbonate by transesterification

Jie Xu <sup>a,\*</sup>, Kai-Zhou Long <sup>a</sup>, Ting Chen <sup>a</sup>, Bing Xue <sup>a</sup>, Yong-Xin Li <sup>a,\*</sup>, Yong Cao <sup>b</sup>

<sup>a</sup> Jiangsu Key Laboratory of Advanced Catalytic Materials and Technology, College of Chemistry and Chemical Engineering, Changzhou University, Gehu Road 1, Changzhou, Jiangsu 213164, PR China

<sup>b</sup> Shanghai Key Laboratory of Molecular Catalysis and Innovative Materials, Department of Chemistry, Fudan University, Shanghai 200433, PR China

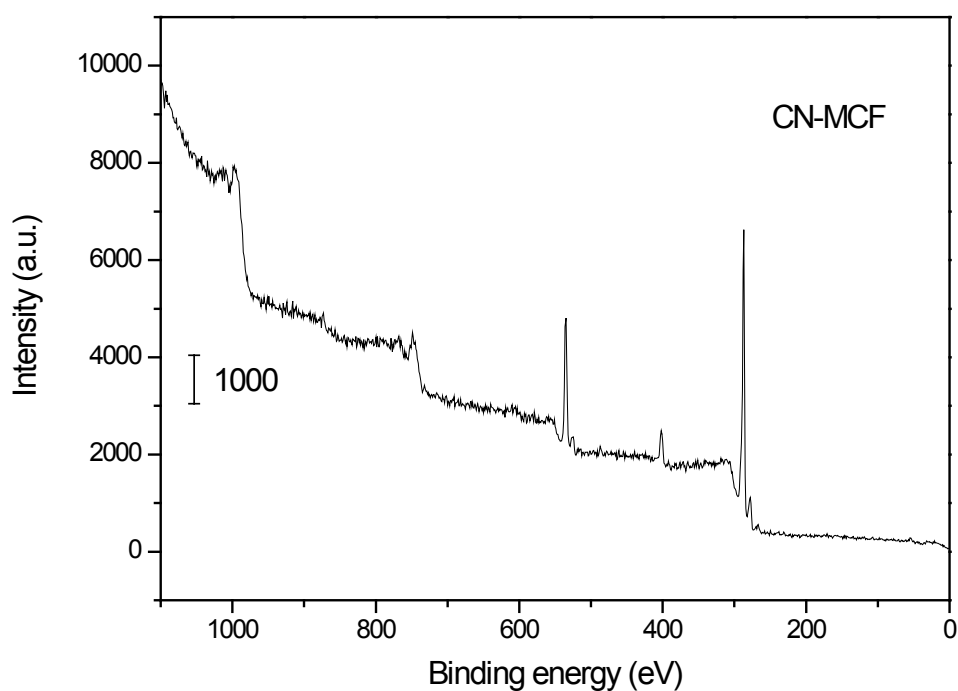

**Fig. S1 XPS survey spectrum of CN-MCF.**

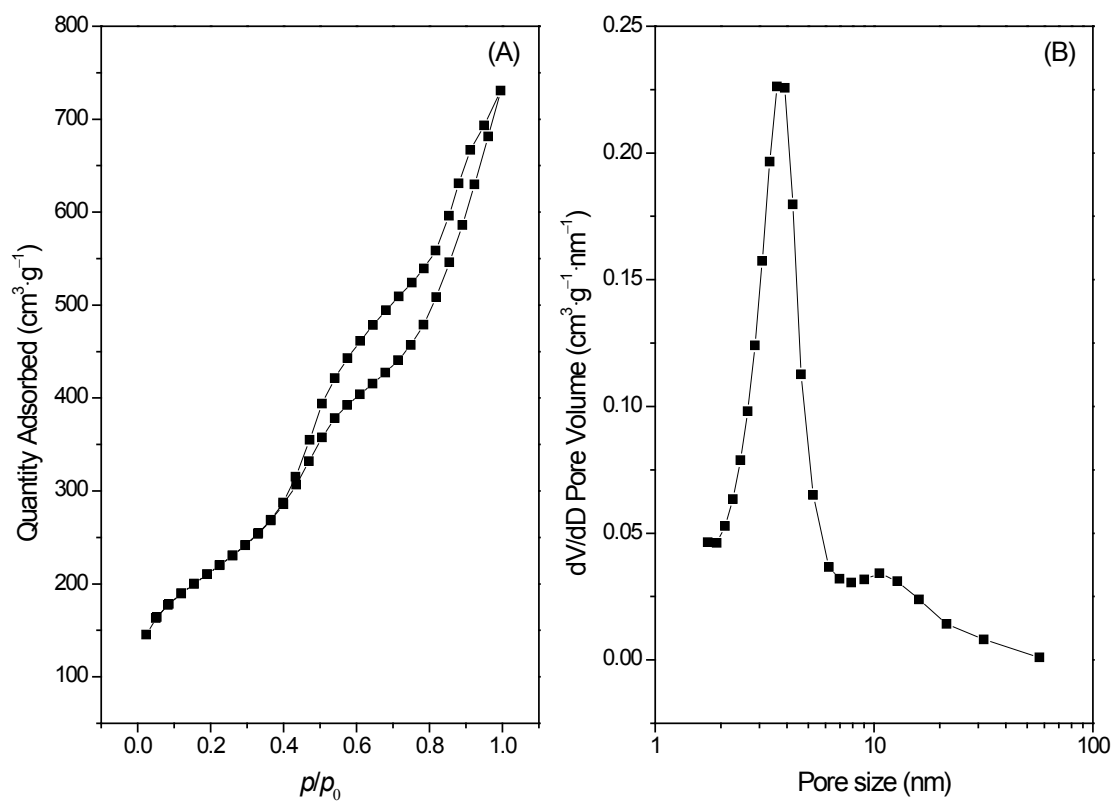

**Fig. S2 N<sub>2</sub> adsorption-desorption isotherms (A) and PSD curve (B) of CN-SBA-15.**

**Table S1 Textural properties of CN-SBA-15.**

| Sample    | $S_{\text{BET}}$ (m <sup>2</sup> ·g <sup>-1</sup> ) | Pore size <sup>a</sup> (nm) | $V_p$ <sup>b</sup> (cm <sup>3</sup> ·g <sup>-1</sup> ) |
|-----------|-----------------------------------------------------|-----------------------------|--------------------------------------------------------|
| CN-SBA-15 | 753                                                 | 3.9                         | 1.13                                                   |

<sup>a</sup> Determined by the adsorption branch of isotherms.

<sup>b</sup> Pore Volume.

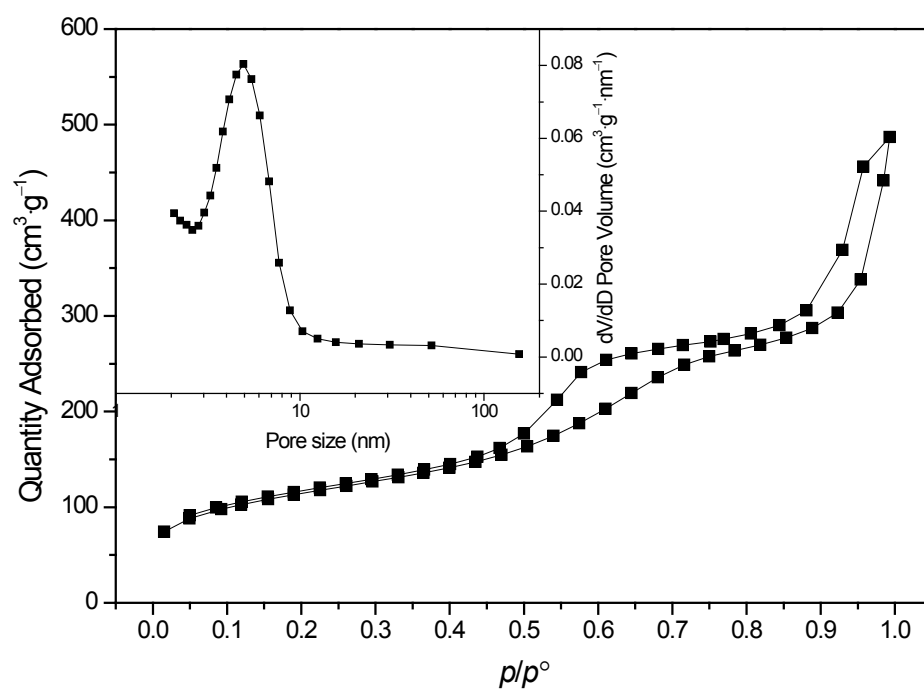

**Fig. S3** N<sub>2</sub> adsorption–desorption isotherms and PSD curve (the inset) of CN-MCF subjected to five catalytic running cycles.

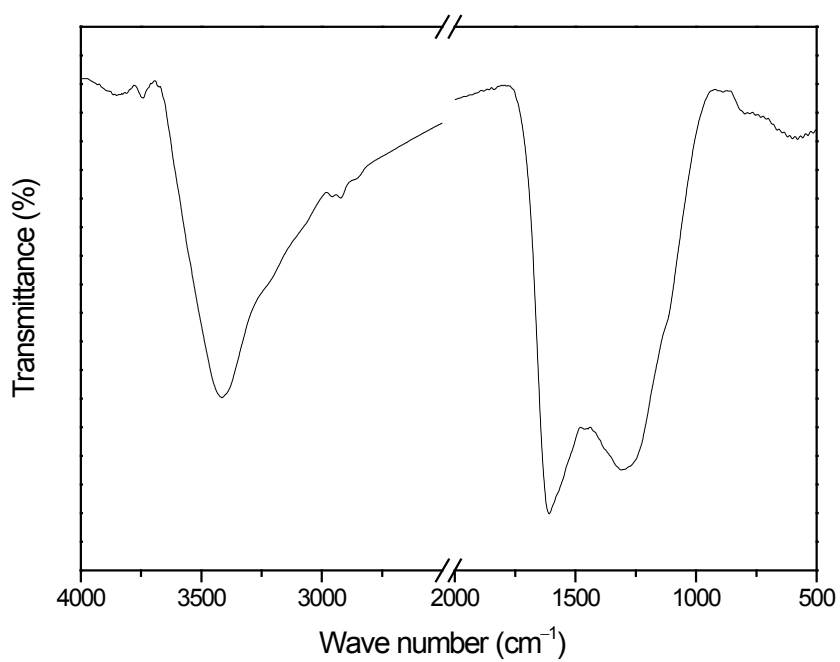

**Fig. S4 FT-IR spectrum of CN-MCF subjected to five catalytic running cycles.**
